# Supplementary material for: Volatile Composition and Classification of Paeonia lactiflora Flower Aroma Types and Identification of the Fragrance-Related Genes
Source: MDPI journal article supplement (doi:10.3390/ijms24119410), 2023-05-28
Supplement: s1 [file s1]

Table S1. Sensory evaluation scores of 87 herbaceous peony cultivars.

| Cultivars            | Group                           | Score (mean ± SD) | Pic.                                                                                | Aroma level                   |  | Cultivars           | Group                           | Score (mean ± SD) | Pic.                                                                                  | Aroma level                     |
|----------------------|---------------------------------|-------------------|-------------------------------------------------------------------------------------|-------------------------------|--|---------------------|---------------------------------|-------------------|---------------------------------------------------------------------------------------|---------------------------------|
| Dan Feng             | Lactiflora peony cultivar group | 3.913±0.042       |    | strong fragrance (3-4 points) |  | Jin Zan Ci Yu       | Lactiflora peony cultivar group | 1.958±0.088       |    | no/light fragrance (1-2 points) |
| Cang Long            | Lactiflora peony cultivar group | 3.788±0.061       |    | strong fragrance (3-4 points) |  | First Arrival       | Itoh peony cultivar group       | 1.905±0.012       |    | no/light fragrance (1-2 points) |
| Hong Cha Hua         | Lactiflora peony cultivar group | 3.712±0.087       |    | strong fragrance (3-4 points) |  | Kun Shan Xia Guang  | Lactiflora peony cultivar group | 1.890±0.054       |    | no/light fragrance (1-2 points) |
| Wu Hua Long Yu       | Lactiflora peony cultivar group | 3.614±0.077       |    | strong fragrance (3-4 points) |  | Sha Jin Guan Ding   | Lactiflora peony cultivar group | 1.814±0.073       |    | no/light fragrance (1-2 points) |
| Madame De Verneville | Lactiflora peony cultivar group | 3.609±0.041       |    | strong fragrance (3-4 points) |  | Pink Giant          | Lactiflora peony cultivar group | 1.811±0.105       |    | no/light fragrance (1-2 points) |
| Red Sarah Bernhardt  | Lactiflora peony cultivar group | 3.586±0.071       |    | strong fragrance (3-4 points) |  | Huo Lian Jin Dan    | Lactiflora peony cultivar group | 1.801±0.076       |    | no/light fragrance (1-2 points) |
| Chi Fen              | Lactiflora peony cultivar group | 3.460±0.052       |    | strong fragrance (3-4 points) |  | Feng Yu Luo Jin Chi | Lactiflora peony cultivar group | 1.730±0.085       |    | no/light fragrance (1-2 points) |
| Hei Xiu Qiu          | Lactiflora peony cultivar group | 3.299±0.061       |    | strong fragrance (3-4 points) |  | Kansas              | Lactiflora peony cultivar group | 1.729±0.066       |    | no/light fragrance (1-2 points) |
| Lollipop             | Itoh peony cultivar group       | 3.271±0.066       |    | strong fragrance (3-4 points) |  | Jin Dai Wei         | Lactiflora peony cultivar group | 1.710±0.045       |    | no/light fragrance (1-2 points) |
| Hong Feng Zhan Chi   | Lactiflora peony cultivar group | 3.250±0.105       |    | strong fragrance (3-4 points) |  | Xi Shi Lan          | Lactiflora peony cultivar group | 1.668±0.061       |    | no/light fragrance (1-2 points) |
| Hong Xiu Qiu         | Lactiflora peony cultivar group | 3.163±0.034       |   | strong fragrance (3-4 points) |  | Hong Yan Fei Shuang | Lactiflora peony cultivar group | 1.613±0.031       |   | no/light fragrance (1-2 points) |
| Alexander Fleming    | Lactiflora peony cultivar group | 3.151±0.045       |  | strong fragrance (3-4 points) |  | Yan Zi Xiang Yang   | Lactiflora peony cultivar group | 1.610±0.016       |  | no/light fragrance (1-2 points) |
| Fen Yu Lou           | Lactiflora peony cultivar group | 3.102±0.013       |  | strong fragrance (3-4 points) |  | Callie's Memory     | Itoh peony cultivar group       | 1.601±0.071       |  | no/light fragrance (1-2 points) |
| Yuan Ye Jin Qiu      | Lactiflora peony cultivar group | 3.050±0.094       |  | strong fragrance (3-4 points) |  | Cora Louise         | Itoh peony cultivar group       | 1.598±0.023       |  | no/light fragrance (1-2 points) |
| Angel Cheeks         | Lactiflora peony cultivar group | 3.044±0.072       |  | strong fragrance (3-4 points) |  | Paul M. Wild        | Lactiflora peony cultivar group | 1.579±0.096       |  | no/light fragrance (1-2 points) |
| Gardenia             | Lactiflora peony cultivar group | 3.002±0.035       |  | strong fragrance (3-4 points) |  | White Cap           | Lactiflora peony cultivar group | 1.546±0.077       |  | no/light fragrance (1-2 points) |
| Yang Fei Chu Yu      | Lactiflora peony cultivar group | 2.939±0.101       |  | medium fragrance (2-3 points) |  | Qi Hua Lu Shuang    | Lactiflora peony cultivar group | 1.545±0.019       |  | no/light fragrance (1-2 points) |

|                     |                                 |             |                                                                                     |                               |  |                           |                                 |             |                                                                                       |                                 |
|---------------------|---------------------------------|-------------|-------------------------------------------------------------------------------------|-------------------------------|--|---------------------------|---------------------------------|-------------|---------------------------------------------------------------------------------------|---------------------------------|
| Hong Guang Qi Jin   | Lactiflora peony cultivar group | 2.908±0.023 |    | medium fragrance (2-3 points) |  | Hu Shui Dang Xia          | Lactiflora peony cultivar group | 1.528±0.071 |    | no/light fragrance (1-2 points) |
| Xiu Lan             | Lactiflora peony cultivar group | 2.882±0.019 |    | medium fragrance (2-3 points) |  | Shui Ying Chun Lan        | Lactiflora peony cultivar group | 1.522±0.082 |    | no/light fragrance (1-2 points) |
| Yellow Crown        | Itoh peony cultivar group       | 2.871±0.083 |    | medium fragrance (2-3 points) |  | Zi Xia Ying Xue           | Lactiflora peony cultivar group | 1.501±0.052 |    | no/light fragrance (1-2 points) |
| Border charm        | Itoh peony cultivar group       | 2.870±0.056 |    | medium fragrance (2-3 points) |  | Karl Rosenfield           | Lactiflora peony cultivar group | 1.447±0.075 |    | no/light fragrance (1-2 points) |
| Fu Shou Shuang Quan | Lactiflora peony cultivar group | 2.834±0.044 |    | medium fragrance (2-3 points) |  | Mons. Jules Elie          | Lactiflora peony cultivar group | 1.417±0.069 |    | no/light fragrance (1-2 points) |
| Cheddar Cheese      | Lactiflora peony cultivar group | 2.827±0.031 |    | medium fragrance (2-3 points) |  | Hong Fu Shi               | Lactiflora peony cultivar group | 1.329±0.079 |    | no/light fragrance (1-2 points) |
| Canary Brilliants   | Itoh peony cultivar group       | 2.810±0.061 |    | medium fragrance (2-3 points) |  | Hua Hong Chong Lou        | Lactiflora peony cultivar group | 1.319±0.067 |    | no/light fragrance (1-2 points) |
| Lian Tai            | Lactiflora peony cultivar group | 2.805±0.103 |    | medium fragrance (2-3 points) |  | Red Magic                 | Lactiflora peony cultivar group | 1.312±0.041 |    | no/light fragrance (1-2 points) |
| Festiva Maxima      | Lactiflora peony cultivar group | 2.701±0.047 |    | medium fragrance (2-3 points) |  | Buckeye Belle             | Hybrid peony cultivar group     | 1.307±0.044 |    | no/light fragrance (1-2 points) |
| Celebrity           | Lactiflora peony cultivar group | 2.657±0.088 |    | medium fragrance (2-3 points) |  | Susie Q                   | Lactiflora peony cultivar group | 1.301±0.103 |    | no/light fragrance (1-2 points) |
| Hillary             | Itoh peony cultivar group       | 2.646±0.016 |    | medium fragrance (2-3 points) |  | Jacorma                   | Lactiflora peony cultivar group | 1.273±0.076 |    | no/light fragrance (1-2 points) |
| Bing Qing           | Lactiflora peony cultivar group | 2.517±0.078 |    | medium fragrance (2-3 points) |  | Ole Faithful              | Hybrid peony cultivar group     | 1.234±0.105 |    | no/light fragrance (1-2 points) |
| Fen Fu Rong         | Lactiflora peony cultivar group | 2.477±0.091 |   | medium fragrance (2-3 points) |  | Rosea Plena               | Lactiflora peony cultivar group | 1.223±0.059 |   | no/light fragrance (1-2 points) |
| Fen Chi Jin Yu      | Lactiflora peony cultivar group | 2.448±0.085 |  | medium fragrance (2-3 points) |  | Da Di Jie Chun            | Lactiflora peony cultivar group | 1.222±0.074 |  | no/light fragrance (1-2 points) |
| Zi Feng Yu          | Lactiflora peony cultivar group | 2.407±0.029 |  | medium fragrance (2-3 points) |  | Pieterjje Vriend Wagenaar | Lactiflora peony cultivar group | 1.215±0.078 |  | no/light fragrance (1-2 points) |
| Hong Yun Ying Ri    | Lactiflora peony cultivar group | 2.396±0.034 |  | medium fragrance (2-3 points) |  | Tie Gan Zi                | Lactiflora peony cultivar group | 1.214±0.054 |  | no/light fragrance (1-2 points) |
| Mo Zi Ling          | Lactiflora peony cultivar group | 2.388±0.079 |  | medium fragrance (2-3 points) |  | Coral Sunset              | Hybrid peony cultivar group     | 1.202±0.023 |  | no/light fragrance (1-2 points) |
| Sarah Bernhardt     | Lactiflora peony cultivar group | 2.316±0.030 |  | medium fragrance (2-3 points) |  | Adolphe Rousseau          | Lactiflora peony cultivar group | 1.179±0.049 |  | no/light fragrance (1-2 points) |
| Hong Feng           | Lactiflora peony cultivar group | 2.305±0.055 |  | medium fragrance (2-3 points) |  | Da Hong Pao               | Lactiflora peony cultivar group | 1.176±0.048 |  | no/light fragrance (1-2 points) |

|                     |                                 |             |                                                                                   |                               |  |              |                                 |             |                                                                                     |                                 |
|---------------------|---------------------------------|-------------|-----------------------------------------------------------------------------------|-------------------------------|--|--------------|---------------------------------|-------------|-------------------------------------------------------------------------------------|---------------------------------|
| Lan Ju              | Lactiflora peony cultivar group | 2.285±0.076 |  | medium fragrance (2-3 points) |  | Mister Ed    | Lactiflora peony cultivar group | 1.177±0.064 |  | no/light fragrance (1-2 points) |
| Zhong Sheng Fen     | Lactiflora peony cultivar group | 2.275±0.066 |  | medium fragrance (2-3 points) |  | Ruth Clay    | Lactiflora peony cultivar group | 1.167±0.085 |  | no/light fragrance (1-2 points) |
| Sai Fu Gui          | Lactiflora peony cultivar group | 2.208±0.075 |  | medium fragrance (2-3 points) |  | Fen Zhu Pan  | Lactiflora peony cultivar group | 1.138±0.058 |  | no/light fragrance (1-2 points) |
| Mei Gui Zi          | Lactiflora peony cultivar group | 2.194±0.046 |  | medium fragrance (2-3 points) |  | Lao Lai Hong | Lactiflora peony cultivar group | 1.109±0.075 |  | no/light fragrance (1-2 points) |
| Duchesse de Nemours | Lactiflora peony cultivar group | 2.133±0.101 |  | medium fragrance (2-3 points) |  | Tao Li Yan   | Lactiflora peony cultivar group | 1.098±0.039 |  | no/light fragrance (1-2 points) |
| Qing Wen            | Lactiflora peony cultivar group | 2.073±0.097 |  | medium fragrance (2-3 points) |  | Red Charm    | Hybrid peony cultivar group     | 1.094±0.090 |  | no/light fragrance (1-2 points) |
| Martha Bulloch      | Lactiflora peony cultivar group | 2.023±0.086 |  | medium fragrance (2-3 points) |  | Hang Shao    | Lactiflora peony cultivar group | 1.052±0.072 |  | no/light fragrance (1-2 points) |
|                     |                                 |             |                                                                                   |                               |  | Joker        | Lactiflora peony cultivar group | 1.044±0.035 |  | no/light fragrance (1-2 points) |

| Table S2. Sixty-eight compounds from 17 herbaceous peony cultivars. |          |                                          |              |                |               |                |              |              |                |                |                    |              |                |                      |                     |                |                 |            |           |
|---------------------------------------------------------------------|----------|------------------------------------------|--------------|----------------|---------------|----------------|--------------|--------------|----------------|----------------|--------------------|--------------|----------------|----------------------|---------------------|----------------|-----------------|------------|-----------|
| Substances (Type)                                                   | RT (min) | Cultivar name and amount released (ng/g) |              |                |               |                |              |              |                |                |                    |              |                |                      |                     |                |                 |            |           |
|                                                                     |          | Alexander Fleming                        | Angel Cheeks | Cang Long      | Chi Fen       | Dan Feng       | Fen Yu Lou   | Gardenia     | Hei Xiu Qiu    | Hong Cha Hua   | Hong Feng Zhan Chi | Hong Xiu Qiu | Lollipop       | Madame De Verneville | Red Sarah Bernhardt | Wu Hua Long Yu | Yuan Ye Jin Qiu | Joker      |           |
| Terpenoids (41)                                                     |          |                                          |              |                |               |                |              |              |                |                |                    |              |                |                      |                     |                |                 |            |           |
| Monoterpenoids (28)                                                 |          |                                          |              |                |               |                |              |              |                |                |                    |              |                |                      |                     |                |                 |            |           |
| α-Pinene                                                            | 9.27     | 0.00±0.00                                | 16.19±6.70   | 154.15±7.22    | 18.31±0.57    | 374.45±64.68   | 4.11±0.88    | 5.31±0.54    | 39.75±4.98     | 734.09±60.98   | 223.29±11.30       | 8.94±1.32    | 767.67±10.44   | 163.72±52.09         | 0.00±0.00           | 0.60±0.05      | 40.41±1.82      | 0.00±0.00  | 0.00±0.00 |
| β-Pinene                                                            | 11.15    | 0.00±0.00                                | 0.00±0.00    | 259.26±12.34   | 28.56±1.64    | 0.00±0.00      | 0.00±0.00    | 0.00±0.00    | 0.00±0.00      | 0.00±0.00      | 0.00±0.00          | 0.00±0.00    | 0.00±0.00      | 0.00±0.00            | 150.29±19.35        | 0.00±0.00      | 0.00±0.00       | 0.00±0.00  | 0.00±0.00 |
| α-Phellandrene                                                      | 11.65    | 0.00±0.00                                | 0.00±0.00    | 0.00±0.00      | 0.00±0.00     | 0.00±0.00      | 0.00±0.00    | 0.00±0.00    | 0.00±0.00      | 0.00±0.00      | 0.00±0.00          | 0.00±0.00    | 25.76±0.84     | 0.00±0.00            | 0.00±0.00           | 0.00±0.00      | 0.00±0.00       | 0.00±0.00  | 0.00±0.00 |
| 2-Carene                                                            | 11.99    | 0.00±0.00                                | 0.00±0.00    | 91.53±7.88     | 0.00±0.00     | 0.00±0.00      | 26.69±7.18   | 0.00±0.00    | 0.00±0.00      | 17.51±1.26     | 38.82±1.38         | 0.00±0.00    | 38.01±1.55     | 0.00±0.00            | 39.12±0.67          | 1.21±0.89      | 0.00±0.00       | 0.00±0.00  | 0.00±0.00 |
| o-Cymene                                                            | 12.25    | 4.10±1.23                                | 0.00±0.00    | 0.00±0.00      | 0.00±0.00     | 79.42±1.31     | 9.77±1.53    | 1.67±0.45    | 24.43±1.46     | 7.05±1.08      | 0.00±0.00          | 16.09±3.54   | 0.00±0.00      | 36.86±1.26           | 0.00±0.00           | 0.00±0.00      | 0.00±0.00       | 0.00±0.00  | 0.00±0.00 |
| D-Limonene                                                          | 12.40    | 0.00±0.00                                | 0.00±0.00    | 73.63±7.59     | 0.00±0.00     | 154.50±12.51   | 0.00±0.00    | 0.00±0.00    | 184.48±26.93   | 0.00±0.00      | 1.70±0.10          | 153.25±10.28 | 42.61±6.84     | 0.00±0.00            | 1.21±0.19           | 0.00±0.00      | 0.00±0.00       | 0.00±0.00  | 0.00±0.00 |
| Eucalyptol                                                          | 12.44    | 32.93±5.03                               | 26.15±7.28   | 0.00±0.00      | 0.00±0.00     | 0.00±0.00      | 69.69±3.29   | 8.60±2.81    | 0.00±0.00      | 0.00±0.00      | 183.47±33.49       | 2.79±0.98    | 0.00±0.00      | 3.10±0.40            | 1.52±0.78           | 0.00±0.00      | 0.00±0.00       | 0.00±0.00  | 0.00±0.00 |
| ε-Terpinene                                                         | 13.30    | 0.00±0.00                                | 0.00±0.00    | 0.00±0.00      | 0.00±0.00     | 0.00±0.00      | 6.82±0.29    | 0.00±0.00    | 0.00±0.00      | 13.62±2.71     | 0.00±0.00          | 0.00±0.00    | 18.11±4.47     | 0.00±0.00            | 33.54±0.95          | 0.00±0.00      | 0.00±0.00       | 0.00±0.00  | 0.00±0.00 |
| Linalool oxide                                                      | 13.69    | 0.00±0.00                                | 7.06±1.50    | 0.00±0.00      | 0.00±0.00     | 0.00±0.00      | 0.00±0.00    | 3.16±0.68    | 0.00±0.00      | 0.00±0.00      | 0.00±0.00          | 0.00±0.00    | 23.79±3.16     | 22.99±6.04           | 21.13±3.97          | 0.00±0.00      | 0.00±0.00       | 0.00±0.00  | 0.00±0.00 |
| Limonene                                                            | 14.16    | 0.00±0.00                                | 0.00±0.00    | 0.00±0.00      | 0.00±0.00     | 27.63±3.04     | 0.00±0.00    | 0.00±0.00    | 0.00±0.00      | 30.90±3.87     | 10.75±0.79         | 0.00±0.00    | 51.00±12.24    | 0.00±0.00            | 0.00±0.00           | 0.00±0.00      | 0.00±0.00       | 0.00±0.00  | 0.00±0.00 |
| Linalool                                                            | 14.62    | 0.00±0.00                                | 803.29±24.04 | 164.00±5.24    | 119.35±6.15   | 185.75±9.51    | 0.00±0.00    | 609.27±23.64 | 169.29±18.50   | 173.45±17.58   | 375.22±25.13       | 751.69±8.56  | 1968.19±135.69 | 511.26±88.21         | 319.53±22.91        | 251.29±9.78    | 0.00±0.00       | 0.00±0.00  | 0.00±0.00 |
| (-)-cis-rose oxide                                                  | 14.91    | 0.00±0.00                                | 0.00±0.00    | 0.00±0.00      | 13.88±3.23    | 43.14±6.44     | 0.00±0.00    | 0.00±0.00    | 1.55±0.39      | 0.00±0.00      | 8.62±1.16          | 0.00±0.00    | 0.00±0.00      | 12.48±0.52           | 17.47±4.55          | 0.00±0.00      | 0.00±0.00       | 0.00±0.00  | 0.00±0.00 |
| (4e,6c)-alloocimene                                                 | 15.46    | 0.00±0.00                                | 0.00±0.00    | 0.00±0.00      | 0.00±0.00     | 0.00±0.00      | 0.00±0.00    | 0.00±0.00    | 0.00±0.00      | 27.85±3.44     | 0.00±0.00          | 0.00±0.00    | 45.19±9.67     | 0.00±0.00            | 34.43±0.98          | 0.00±0.00      | 0.00±0.00       | 0.00±0.00  | 0.00±0.00 |
| (S)-(-)-Citronellal                                                 | 16.17    | 0.00±0.00                                | 0.00±0.00    | 0.00±0.00      | 13.33±2.47    | 85.56±5.60     | 0.00±0.00    | 0.00±0.00    | 0.00±0.00      | 1.48±0.47      | 0.00±0.00          | 0.00±0.00    | 0.00±0.00      | 0.00±0.00            | 0.00±0.00           | 0.00±0.00      | 0.00±0.00       | 0.00±0.00  | 0.00±0.00 |
| trans-Verbenol                                                      | 16.43    | 0.00±0.00                                | 0.00±0.00    | 0.00±0.00      | 0.00±0.00     | 0.00±0.00      | 0.00±0.00    | 0.00±0.00    | 0.00±0.00      | 13.78±4.58     | 0.00±0.00          | 0.00±0.00    | 0.00±0.00      | 0.00±0.00            | 12.41±1.14          | 0.00±0.00      | 0.00±0.00       | 0.00±0.00  | 0.00±0.00 |
| Lavandulol                                                          | 16.56    | 0.00±0.00                                | 0.00±0.00    | 0.00±0.00      | 28.25±2.70    | 0.00±0.00      | 0.00±0.00    | 0.00±0.00    | 0.00±0.00      | 0.00±0.00      | 0.00±0.00          | 0.00±0.00    | 0.00±0.00      | 0.00±0.00            | 0.00±0.00           | 0.00±0.00      | 0.00±0.00       | 0.00±0.00  | 0.00±0.00 |
| Isoneol                                                             | 16.99    | 0.00±0.00                                | 0.00±0.00    | 0.00±0.00      | 0.00±0.00     | 0.00±0.00      | 0.00±0.00    | 0.00±0.00    | 0.00±0.00      | 33.74±0.43     | 0.00±0.00          | 0.00±0.00    | 0.00±0.00      | 21.55±2.87           | 14.05±2.76          | 0.00±0.00      | 0.00±0.00       | 0.00±0.00  | 0.00±0.00 |
| Myrtenal                                                            | 17.13    | 29.33±9.75                               | 12.17±0.22   | 0.00±0.00      | 17.22±5.20    | 101.67±14.23   | 421.53±4.47  | 5.54±0.26    | 6.72±0.31      | 25.37±9.06     | 9.77±2.10          | 0.00±0.00    | 0.00±0.00      | 0.00±0.00            | 277.00±10.99        | 17.63±5.35     | 6.46±0.42       | 0.00±0.00  | 0.00±0.00 |
| α-Terpinol                                                          | 17.48    | 0.00±0.00                                | 3.30±0.51    | 0.00±0.00      | 0.00±0.00     | 0.00±0.00      | 0.00±0.00    | 4.27±0.58    | 4.76±1.68      | 5.45±1.76      | 10.19±3.36         | 0.00±0.00    | 0.00±0.00      | 83.40±1.98           | 12.29±3.95          | 0.00±0.00      | 0.00±0.00       | 0.00±0.00  | 0.00±0.00 |
| (1S)-Verbenone                                                      | 17.85    | 0.00±0.00                                | 0.00±0.00    | 339.70±50.82   | 0.00±0.00     | 0.00±0.00      | 61.76±7.61   | 0.00±0.00    | 0.00±0.00      | 0.00±0.00      | 0.00±0.00          | 0.00±0.00    | 0.00±0.00      | 0.00±0.00            | 0.00±0.00           | 0.00±0.00      | 0.00±0.00       | 0.00±0.00  | 0.00±0.00 |
| (+)-β-citronellol                                                   | 18.14    | 0.00±0.00                                | 0.00±0.00    | 46.70±4.08     | 11.66±1.43    | 0.00±0.00      | 0.00±0.00    | 0.00±0.00    | 0.00±0.00      | 21.15±5.81     | 0.00±0.00          | 0.00±0.00    | 0.00±0.00      | 8.55±1.02            | 0.00±0.00           | 0.00±0.00      | 0.00±0.00       | 0.00±0.00  | 0.00±0.00 |
| Nerol                                                               | 18.39    | 0.00±0.00                                | 0.00±0.00    | 0.00±0.00      | 0.00±0.00     | 0.00±0.00      | 113.14±2.84  | 0.00±0.00    | 0.00±0.00      | 0.00±0.00      | 0.00±0.00          | 0.00±0.00    | 0.00±0.00      | 0.00±0.00            | 0.00±0.00           | 0.00±0.00      | 0.00±0.00       | 0.00±0.00  | 4.81±0.27 |
| Citronellol                                                         | 18.52    | 111.37±15.69                             | 0.00±0.00    | 3506.51±270.35 | 1315.70±42.26 | 8175.22±392.51 | 0.00±0.00    | 608.92±5.53  | 2502.31±179.43 | 480.58±32.26   | 1873.56±102.75     | 0.00±0.00    | 0.00±0.00      | 2250.67±124.41       | 1323.10±103.32      | 4696.01±200.19 | 0.00±0.00       | 0.00±0.00  | 0.00±0.00 |
| p-Mentha-1(7),8(10)-dien-9-ol                                       | 18.89    | 0.00±0.00                                | 0.00±0.00    | 0.00±0.00      | 0.00±0.00     | 0.00±0.00      | 29.93±7.09   | 0.00±0.00    | 0.00±0.00      | 0.00±0.00      | 0.00±0.00          | 0.00±0.00    | 0.00±0.00      | 0.00±0.00            | 0.00±0.00           | 0.00±0.00      | 0.00±0.00       | 0.00±0.00  | 0.00±0.00 |
| Citral                                                              | 18.72    | 113.20±15.70                             | 0.00±0.00    | 294.58±21.47   | 184.31±25.00  | 480.68±27.65   | 0.00±0.00    | 0.00±0.00    | 167.95±5.83    | 876.35±119.18  | 244.25±16.26       | 467.44±14.41 | 128.86±5.08    | 973.82±85.26         | 577.52±45.70        | 266.47±40.67   | 131.04±11.13    | 0.00±0.00  | 0.00±0.00 |
| Geraniol                                                            | 19.13    | 108.46±1.65                              | 0.00±0.00    | 641.02±67.74   | 145.09±15.59  | 554.58±22.03   | 114.49±2.01  | 411.09±14.36 | 102.98±10.29   | 1661.60±127.40 | 577.59±18.30       | 479.71±10.88 | 249.05±18.60   | 838.55±53.27         | 576.04±11.93        | 437.67±14.86   | 1193.35±63.20   | 0.00±0.00  | 0.00±0.00 |
| (-)-cis-Myrtanol                                                    | 19.43    | 0.00±0.00                                | 0.00±0.00    | 0.00±0.00      | 0.00±0.00     | 0.00±0.00      | 262.89±21.77 | 0.00±0.00    | 0.00±0.00      | 0.00±0.00      | 0.00±0.00          | 0.00±0.00    | 0.00±0.00      | 0.00±0.00            | 0.00±0.00           | 2.43±0.82      | 0.00±0.00       | 0.00±0.00  | 0.00±0.00 |
| perillyl aldehyde                                                   | 19.74    | 0.00±0.00                                | 0.00±0.00    | 0.00±0.00      | 0.00±0.00     | 0.00±0.00      | 45.18±7.76   | 0.00±0.00    | 0.00±0.00      | 0.00±0.00      | 0.00±0.00          | 0.00±0.00    | 0.00±0.00      | 0.00±0.00            | 0.00±0.00           | 15.54±1.87     | 11.51±0.89      | 0.00±0.00  | 0.00±0.00 |
| Sesquiterpenoids (10)                                               |          |                                          |              |                |               |                |              |              |                |                |                    |              |                |                      |                     |                |                 |            |           |
| Modopene                                                            | 22.42    | 0.00±0.00                                | 27.36±4.62   | 0.00±0.00      | 18.29±0.64    | 0.00±0.00      | 0.00±0.00    | 3.60±0.31    | 0.00±0.00      | 0.00±0.00      | 0.00±0.00          | 0.00±0.00    | 0.00±0.00      | 0.00±0.00            | 0.00±0.00           | 0.00±0.00      | 0.00±0.00       | 0.00±0.00  | 0.00±0.00 |
| Alloaromadendrene                                                   | 23.25    | 1.45±0.88                                | 0.00±0.00    | 0.00±0.00      | 0.00±0.00     | 0.00±0.00      | 0.00±0.00    | 0.89±0.08    | 0.00±0.00      | 0.00±0.00      | 3.91±0.56          | 0.00±0.00    | 0.00±0.00      | 0.00±0.00            | 0.00±0.00           | 7.92±1.94      | 0.00±0.00       | 0.00±0.00  | 0.00±0.00 |
| Caryophyllene                                                       | 23.69    | 151.56±28.57                             | 143.65±28.99 | 312.50±27.79   | 105.93±5.45   | 323.42±33.51   | 108.46±5.74  | 120.57±7.43  | 120.69±12.73   | 160.38±33.86   | 472.09±29.51       | 101.10±0.34  | 221.13±17.21   | 0.00±0.00            | 111.09±3.73         | 148.05±25.56   | 102.81±11.66    | 46.54±7.17 | 0.00±0.00 |
| α-Longipinene                                                       | 23.87    | 2.21±0.34                                | 0.00±0.00    | 8.86±0.86      | 13.80±1.59    | 0.00±0.00      | 0.00±0.00    | 0.00±0.00    | 0.65±0.04      | 2.41±0.31      | 23.06±1.37         | 0.00±0.00    | 2.88±0.56      | 0.00±0.00            | 0.00±0.00           | 2.13±0.84      | 0.00±0.00       | 0.00±0.00  | 0.00±0.00 |
| 1R,3Z,9S-4,11,11-Trimethyl-8-methylenebicyclo[7.2.0]undec-3-ene     | 24.41    | 0.00±0.00                                | 0.00±0.00    | 23.80±1.74     | 0.00±0.00     | 23.55±5.03     | 0.00±0.00    | 27.95±8.58   | 0.00±0.00      | 10.09±2.56     | 6.63±1.58          | 0.00±0.00    | 5.64±0.84      | 0.00±0.00            | 8.27±2.03           | 2.74±0.79      | 0.00±0.00       | 0.00±0.00  | 0.00±0.00 |
| Humulene                                                            | 24.57    | 17.62±1.99                               | 8.40±0.62    | 36.97±2.42     | 0.00±0.00     | 68.97±2.70     | 16.41±5.45   | 2.81±0.26    | 2.78±0.19      | 10.84±1.17     | 58.39±18.34        | 0.00±0.00    | 60.18±2.90     | 0.00±0.00            | 0.00±0.00           | 18.58±3.36     | 10.62±1.36      | 9.23±0.77  | 0.00±0.00 |
| Elemol                                                              | 26.81    | 0.00±0.00                                | 0.00±0.00    | 0.00±0.00      | 0.00±0.00     | 0.00±0.00      | 0.00±0.00    | 0.00±0.00    | 0.00±0.00      | 0.00±0.00      | 0.00±0.00          | 0.00±0.00    | 28.37±6.35     | 0.00±0.00            | 0.00±0.00           | 0.00±0.00      | 0.00±0.00       | 0.00±0.00  | 0.00±0.00 |
| Nerolidol                                                           | 27.09    | 0.00±0.00                                | 8.46±0.41    | 0.00±0.00      | 0.00±0.00     | 0.00±0.00      | 0.00±0.00    | 23.34±1.99   | 0.00±0.00      | 8.22±0.36      | 5.86±0.13          | 8.59±1.61    | 41.50±2.67     | 45.01±4.59           | 45.54±5.96          | 0.00±0.00      | 0.00±0.00       | 0.00±0.00  | 0.00±     |

|                                     |       |              |             |              |              |              |              |              |              |              |             |              |              |              |              |              |              |            |
|-------------------------------------|-------|--------------|-------------|--------------|--------------|--------------|--------------|--------------|--------------|--------------|-------------|--------------|--------------|--------------|--------------|--------------|--------------|------------|
| 3-Hexen-1-ol                        | 6.89  | 128.08±12.63 | 122.74±8.53 | 544.70±89.44 | 233.10±8.40  | 117.07±19.85 | 192.41±16.94 | 156.73±12.24 | 282.63±13.77 | 222.16±11.60 | 0.00±0.00   | 233.54±27.08 | 0.00±0.00    | 194.86±19.33 | 239.59±18.93 | 177.66±18.67 | 0.00±0.00    | 0.00±0.00  |
| trans-2-Hexenol                     | 7.23  | 0.00±0.00    | 0.00±0.00   | 11.61±1.59   | 39.87±9.31   | 0.00±0.00    | 135.76±7.31  | 0.00±0.00    | 18.20±0.69   | 0.00±0.00    | 121.24±2.80 | 0.00±0.00    | 0.00±0.00    | 0.00±0.00    | 0.00±0.00    | 0.00±0.00    | 69.30±12.07  | 0.00±0.00  |
| 1-Hexanol                           | 7.37  | 82.36±1.77   | 46.61±3.13  | 338.73±69.85 | 212.49±21.15 | 197.16±49.80 | 0.00±0.00    | 37.50±2.11   | 254.34±21.86 | 0.00±0.00    | 194.32±9.49 | 63.84±11.10  | 227.96±80.30 | 26.85±4.71   | 113.25±23.68 | 353.05±15.56 | 249.50±17.50 | 0.00±0.00  |
| 1-Hexanol, 2-ethyl-                 | 12.40 | 0.00±0.00    | 0.00±0.00   | 0.00±0.00    | 100.29±7.37  | 0.00±0.00    | 0.00±0.00    | 0.00±0.00    | 0.00±0.00    | 0.00±0.00    | 0.00±0.00   | 0.00±0.00    | 0.00±0.00    | 0.00±0.00    | 0.00±0.00    | 165.39±28.16 | 0.00±0.00    | 0.00±0.00  |
| Dodecane                            | 13.77 | 0.00±0.00    | 0.00±0.00   | 0.00±0.00    | 0.00±0.00    | 0.00±0.00    | 0.00±0.00    | 0.00±0.00    | 0.00±0.00    | 0.00±0.00    | 27.30±4.05  | 0.00±0.00    | 0.00±0.00    | 0.00±0.00    | 0.00±0.00    | 3.60±0.76    | 87.80±6.57   | 0.00±0.00  |
| 2,6-Dimethyldecane                  | 13.93 | 0.00±0.00    | 0.00±0.00   | 9.46±1.11    | 0.00±0.00    | 0.00±0.00    | 0.00±0.00    | 0.00±0.00    | 0.00±0.00    | 0.00±0.00    | 0.00±0.00   | 0.00±0.00    | 29.08±7.23   | 0.00±0.00    | 11.09±1.37   | 0.00±0.00    | 0.00±0.00    | 0.00±0.00  |
| Undecane, 4-methyl-                 | 14.39 | 0.00±0.00    | 0.00±0.00   | 26.60±4.26   | 0.00±0.00    | 0.00±0.00    | 0.00±0.00    | 0.00±0.00    | 0.00±0.00    | 0.00±0.00    | 14.63±1.56  | 0.00±0.00    | 0.00±0.00    | 0.00±0.00    | 0.00±0.00    | 0.00±0.00    | 0.00±0.00    | 0.00±0.00  |
| Nonanal                             | 14.74 | 2.04±0.11    | 4.53±0.51   | 0.00±0.00    | 25.56±0.36   | 24.88±6.39   | 0.00±0.00    | 0.00±0.00    | 5.90±0.56    | 0.00±0.00    | 0.00±0.00   | 1.71±0.33    | 0.00±0.00    | 11.59±0.29   | 33.05±3.70   | 0.00±0.00    | 0.00±0.00    | 7.71±0.97  |
| trans-2-Nonenal                     | 16.42 | 0.00±0.00    | 0.00±0.00   | 0.00±0.00    | 20.76±1.19   | 0.00±0.00    | 0.00±0.00    | 0.00±0.00    | 0.00±0.00    | 0.00±0.00    | 0.00±0.00   | 0.00±0.00    | 4.99±1.14    | 0.00±0.00    | 0.00±0.00    | 3.04±0.77    | 0.00±0.00    | 0.00±0.00  |
| Heptadecane                         | 30.30 | 0.00±0.00    | 2.77±0.29   | 0.00±0.00    | 0.00±0.00    | 0.00±0.00    | 0.00±0.00    | 0.00±0.00    | 0.00±0.00    | 0.00±0.00    | 0.00±0.00   | 12.47±2.26   | 0.00±0.00    | 12.45±0.70   | 0.00±0.00    | 0.00±0.00    | 31.21±8.57   | 27.91±5.89 |
| 2-Pentadecanone, 6,10,14-trimethyl- | 33.29 | 8.00±0.49    | 4.23±0.69   | 21.13±2.67   | 3.98±0.61    | 0.00±0.00    | 0.00±0.00    | 3.82±0.91    | 0.00±0.00    | 0.00±0.00    | 0.00±0.00   | 5.22±0.41    | 0.00±0.00    | 13.18±0.73   | 2.53±0.31    | 0.00±0.00    | 1.74±0.33    | 4.93±0.98  |
| Eicosane                            | 39.04 | 6.49±1.59    | 4.74±0.76   | 21.07±7.09   | 7.41±2.04    | 47.37±6.73   | 14.12±5.49   | 4.30±0.67    | 13.76±1.64   | 28.43±1.79   | 15.29±5.04  | 8.01±0.90    | 6.39±0.22    | 16.57±4.70   | 6.39±0.65    | 0.00±0.00    | 18.39±6.83   | 17.49±1.24 |

| Table S3. Thirty-two newly founded compounds from 17 cultivars. |             |                                          |              |              |              |              |              |              |              |              |                    |              |               |                      |                     |                |                 |              |
|-----------------------------------------------------------------|-------------|------------------------------------------|--------------|--------------|--------------|--------------|--------------|--------------|--------------|--------------|--------------------|--------------|---------------|----------------------|---------------------|----------------|-----------------|--------------|
| Substances (Type)                                               | RT<br>(min) | Cultivar name and amount released (ng/g) |              |              |              |              |              |              |              |              |                    |              |               |                      |                     |                |                 |              |
|                                                                 |             | Alexander Fleming                        | Angel Cheeks | Cang Long    | Chi Fen      | Dan Feng     | Fen Yu Lou   | Gardenia     | Hei Xiu Qiu  | Hong Cha Hua | Hong Feng Zhan Chi | Hong Xiu Qiu | Lollipop      | Madame De Verneville | Red Sarah Bernhardt | Wu Hua Long Yu | Yuan Ye Jin Qiu | Joker        |
| <b>Terpenoids (13)</b>                                          |             |                                          |              |              |              |              |              |              |              |              |                    |              |               |                      |                     |                |                 |              |
| <b>Monoterpenoids (8)</b>                                       |             |                                          |              |              |              |              |              |              |              |              |                    |              |               |                      |                     |                |                 |              |
| 2-Carene                                                        | 11.99       | 0.00±0.00                                | 0.00±0.00    | 0.00±0.00    | 0.00±0.00    | 0.00±0.00    | 26.69±7.18   | 0.00±0.00    | 0.00±0.00    | 17.51±1.26   | 7.82±1.38          | 0.00±0.00    | 38.01±1.55    | 0.00±0.00            | 8.55±0.67           | 1.21±0.89      | 0.00±0.00       | 0.00±0.00    |
| o-Cymene                                                        | 12.25       | 4.10±1.23                                | 0.00±0.00    | 0.00±0.00    | 0.00±0.00    | 22.70±1.31   | 9.77±1.53    | 0.00±0.00    | 1.67±0.45    | 24.43±1.46   | 7.05±1.08          | 0.00±0.00    | 16.09±3.54    | 0.00±0.00            | 9.39±1.26           | 0.00±0.00      | 0.00±0.00       | 0.00±0.00    |
| Linalool oxide                                                  | 13.69       | 0.00±0.00                                | 7.06±1.50    | 0.00±0.00    | 0.00±0.00    | 0.00±0.00    | 0.00±0.00    | 3.16±0.68    | 0.00±0.00    | 0.00±0.00    | 0.00±0.00          | 0.00±0.00    | 23.79±3.16    | 22.99±6.04           | 21.13±3.97          | 0.00±0.00      | 0.00±0.00       | 0.00±0.00    |
| Lavandulol                                                      | 16.56       | 0.00±0.00                                | 0.00±0.00    | 0.00±0.00    | 28.25±2.70   | 0.00±0.00    | 0.00±0.00    | 0.00±0.00    | 0.00±0.00    | 0.00±0.00    | 0.00±0.00          | 0.00±0.00    | 0.00±0.00     | 0.00±0.00            | 0.00±0.00           | 0.00±0.00      | 0.00±0.00       | 0.00±0.00    |
| Isoneral                                                        | 16.99       | 0.00±0.00                                | 0.00±0.00    | 0.00±0.00    | 0.00±0.00    | 0.00±0.00    | 0.00±0.00    | 0.00±0.00    | 0.00±0.00    | 33.74±0.43   | 0.00±0.00          | 0.00±0.00    | 0.00±0.00     | 21.55±2.87           | 14.05±2.76          | 0.00±0.00      | 0.00±0.00       | 0.00±0.00    |
| Myrtenal                                                        | 17.13       | 29.33±9.75                               | 12.17±0.22   | 0.00±0.00    | 17.22±5.20   | 101.67±14.23 | 421.53±4.47  | 5.54±0.26    | 6.72±0.31    | 25.37±9.06   | 9.77±2.10          | 0.00±0.00    | 0.00±0.00     | 0.00±0.00            | 0.00±0.00           | 277.00±10.99   | 17.63±5.35      | 6.46±0.42    |
| (-)-cis-Myrtenol                                                | 19.43       | 0.00±0.00                                | 0.00±0.00    | 0.00±0.00    | 0.00±0.00    | 0.00±0.00    | 262.89±21.77 | 0.00±0.00    | 0.00±0.00    | 0.00±0.00    | 0.00±0.00          | 0.00±0.00    | 0.00±0.00     | 0.00±0.00            | 0.00±0.00           | 2.43±0.82      | 0.00±0.00       | 0.00±0.00    |
| perillyl aldehyde                                               | 19.74       | 0.00±0.00                                | 0.00±0.00    | 0.00±0.00    | 0.00±0.00    | 0.00±0.00    | 45.18±7.76   | 0.00±0.00    | 0.00±0.00    | 0.00±0.00    | 0.00±0.00          | 0.00±0.00    | 0.00±0.00     | 0.00±0.00            | 0.00±0.00           | 15.54±1.87     | 11.51±0.89      | 0.00±0.00    |
| <b>Sesquiterpenoids (4)</b>                                     |             |                                          |              |              |              |              |              |              |              |              |                    |              |               |                      |                     |                |                 |              |
| Modopene                                                        | 22.42       | 0.00±0.00                                | 27.36±4.62   | 0.00±0.00    | 18.29±0.64   | 0.00±0.00    | 0.00±0.00    | 3.60±0.31    | 0.00±0.00    | 0.00±0.00    | 0.00±0.00          | 0.00±0.00    | 0.00±0.00     | 0.00±0.00            | 0.00±0.00           | 0.00±0.00      | 0.00±0.00       | 0.00±0.00    |
| Alloaromadendrene                                               | 23.25       | 1.45±0.88                                | 0.00±0.00    | 0.00±0.00    | 0.00±0.00    | 0.00±0.00    | 0.00±0.00    | 0.89±0.08    | 0.00±0.00    | 0.00±0.00    | 3.91±0.56          | 0.00±0.00    | 0.00±0.00     | 0.00±0.00            | 0.00±0.00           | 7.92±1.94      | 0.00±0.00       | 0.00±0.00    |
| Humulene                                                        | 24.57       | 17.62±1.99                               | 8.40±0.62    | 36.97±2.42   | 0.00±0.00    | 68.97±2.70   | 16.41±5.45   | 2.81±0.26    | 2.78±0.19    | 10.84±1.17   | 58.39±18.34        | 0.00±0.00    | 60.18±2.90    | 0.00±0.00            | 0.00±0.00           | 18.58±3.36     | 10.62±1.36      | 9.23±0.77    |
| Elemol                                                          | 26.81       | 0.00±0.00                                | 0.00±0.00    | 0.00±0.00    | 0.00±0.00    | 0.00±0.00    | 0.00±0.00    | 0.00±0.00    | 0.00±0.00    | 0.00±0.00    | 0.00±0.00          | 0.00±0.00    | 28.37±6.35    | 0.00±0.00            | 0.00±0.00           | 0.00±0.00      | 0.00±0.00       | 0.00±0.00    |
| <b>Irregular terpenoids (1)</b>                                 |             |                                          |              |              |              |              |              |              |              |              |                    |              |               |                      |                     |                |                 |              |
| (1R)-(+)-Nopinone                                               | 15.75       | 0.00±0.00                                | 0.00±0.00    | 0.00±0.00    | 0.00±0.00    | 0.00±0.00    | 87.51±16.96  | 0.00±0.00    | 0.00±0.00    | 0.00±0.00    | 0.00±0.00          | 0.00±0.00    | 0.00±0.00     | 0.00±0.00            | 0.00±0.00           | 47.84±10.81    | 0.00±0.00       | 0.00±0.00    |
| <b>Benzenoids/Phenylprop<br/>anoids (7)</b>                     |             |                                          |              |              |              |              |              |              |              |              |                    |              |               |                      |                     |                |                 |              |
| Benzaldehyde                                                    | 10.25       | 0.00±0.00                                | 0.00±0.00    | 0.00±0.00    | 61.44±3.86   | 0.00±0.00    | 18.76±6.96   | 0.00±0.00    | 1.73±0.27    | 0.00±0.00    | 0.00±0.00          | 0.00±0.00    | 0.00±0.00     | 23.73±5.81           | 5.30±0.92           | 0.00±0.00      | 0.00±0.00       | 23.56±3.91   |
| Benzyl alcohol                                                  | 12.62       | 0.00±0.00                                | 0.00±0.00    | 0.00±0.00    | 89.06±11.93  | 0.00±0.00    | 52.33±9.15   | 0.00±0.00    | 0.00±0.00    | 0.00±0.00    | 0.00±0.00          | 0.00±0.00    | 0.00±0.00     | 7.23±0.89            | 0.00±0.00           | 1.52±0.19      | 0.00±0.00       | 47.17±1.78   |
| Benzaldehyde, 2-<br>hydroxy-                                    | 12.99       | 0.00±0.00                                | 0.00±0.00    | 0.00±0.00    | 0.00±0.00    | 0.00±0.00    | 254.90±35.27 | 0.00±0.00    | 0.00±0.00    | 0.00±0.00    | 0.00±0.00          | 0.00±0.00    | 0.00±0.00     | 0.00±0.00            | 0.00±0.00           | 0.00±0.00      | 0.00±0.00       | 729.69±22.29 |
| Acetophenone                                                    | 13.53       | 0.00±0.00                                | 0.00±0.00    | 0.00±0.00    | 27.59±5.81   | 0.00±0.00    | 0.00±0.00    | 0.00±0.00    | 0.00±0.00    | 39.71±17.75  | 0.00±0.00          | 0.00±0.00    | 0.00±0.00     | 0.00±0.00            | 26.83±3.10          | 0.00±0.00      | 0.00±0.00       | 0.00±0.00    |
| Methyl benzoate                                                 | 14.47       | 0.00±0.00                                | 0.00±0.00    | 0.00±0.00    | 0.00±0.00    | 0.00±0.00    | 0.00±0.00    | 0.00±0.00    | 0.00±0.00    | 0.00±0.00    | 0.00±0.00          | 0.00±0.00    | 0.00±0.00     | 18.65±1.72           | 0.00±0.00           | 0.00±0.00      | 0.00±0.00       | 25.42±5.73   |
| Benzenecetic acid, 4-<br>tridecyl ester                         | 15.37       | 0.00±0.00                                | 0.00±0.00    | 0.00±0.00    | 0.00±0.00    | 0.00±0.00    | 0.00±0.00    | 0.00±0.00    | 0.00±0.00    | 0.00±0.00    | 30.73±1.66         | 0.00±0.00    | 0.00±0.00     | 12.28±1.28           | 0.00±0.00           | 0.00±0.00      | 0.00±0.00       | 0.00±0.00    |
| Benzene, 1,2-dimethoxy-                                         | 15.92       | 0.00±0.00                                | 0.00±0.00    | 0.00±0.00    | 0.00±0.00    | 254.97±1.41  | 0.00±0.00    | 49.66±6.42   | 0.00±0.00    | 0.00±0.00    | 0.00±0.00          | 0.00±0.00    | 0.00±0.00     | 309.70±8.48          | 66.50±2.32          | 0.00±0.00      | 0.00±0.00       | 0.00±0.00    |
| <b>Fatty acid derivatives<br/>(12)</b>                          |             |                                          |              |              |              |              |              |              |              |              |                    |              |               |                      |                     |                |                 |              |
| Hexanal                                                         | 5.21        | 492.56±18.44                             | 354.57±30.18 | 118.86±20.45 | 363.69±45.94 | 511.76±65.21 | 392.77±46.95 | 309.88±21.22 | 306.01±16.40 | 412.80±13.87 | 419.45±68.38       | 446.48±43.97 | 771.36±35.02  | 286.77±40.09         | 381.98±33.29        | 317.37±47.37   | 371.96±19.14    | 490.32±57.54 |
| 3-Hexenal                                                       | 5.24        | 0.00±0.00                                | 0.00±0.00    | 0.00±0.00    | 0.00±0.00    | 0.00±0.00    | 0.00±0.00    | 67.76±2.68   | 0.00±0.00    | 0.00±0.00    | 0.00±0.00          | 0.00±0.00    | 0.00±0.00     | 51.45±9.28           | 0.00±0.00           | 0.00±0.00      | 0.00±0.00       | 0.00±0.00    |
| 2-Hexenal                                                       | 6.85        | 723.97±83.11                             | 568.46±80.67 | 273.50±35.89 | 251.45±20.76 | 523.62±59.85 | 365.33±18.68 | 596.78±17.95 | 223.11±43.52 | 436.45±16.38 | 723.61±168.07      | 389.61±57.06 | 517.48±116.35 | 815.93±139.11        | 383.63±73.06        | 616.20±37.04   | 849.79±61.15    | 674.49±29.70 |
| trans-2-Hexenol                                                 | 7.23        | 0.00±0.00                                | 0.00±0.00    | 11.61±1.59   | 39.87±9.31   | 0.00±0.00    | 135.76±7.31  | 0.00±0.00    | 18.20±0.69   | 0.00±0.00    | 121.24±2.80        | 0.00±0.00    | 0.00±0.00     | 0.00±0.00            | 0.00±0.00           | 0.00±0.00      | 69.30±12.07     | 0.00±0.00    |
| 1-Hexanol, 2-ethyl-                                             | 12.40       | 0.00±0.00                                | 0.00±0.00    | 0.00±0.00    | 100.29±7.37  | 0.00±0.00    | 0.00±0.00    | 0.00±0.00    | 0.00±0.00    | 0.00±0.00    | 0.00±0.00          | 0.00±0.00    | 0.00±0.00     | 0.00±0.00            | 0.00±0.00           | 165.39±28.16   | 0.00±0.00       | 0.00±0.00    |
| Dodecane                                                        | 13.77       | 0.00±0.00                                | 0.00±0.00    | 0.00±0.00    | 0.00±0.00    | 0.00±0.00    | 0.00±0.00    | 0.00±0.00    | 0.00±0.00    | 0.00±0.00    | 27.30±4.05         | 0.00±0.00    | 0.00±0.00     | 0.00±0.00            | 3.60±0.76           | 0.00±0.00      | 87.80±6.57      | 0.00±0.00    |
| 2,6-Dimethyldecane                                              | 13.93       | 0.00±0.00                                | 0.00±0.00    | 9.46±1.11    | 0.00±0.00    | 0.00±0.00    | 0.00±0.00    | 0.00±0.00    | 0.00±0.00    | 0.00±0.00    | 0.00±0.00          | 0.00±0.00    | 29.08±7.23    | 0.00±0.00            | 11.09±1.37          | 0.00±0.00      | 0.00±0.00       | 0.00±0.00    |
| Undecane, 4-methyl-                                             | 14.39       | 0.00±0.00                                | 0.00±0.00    | 26.60±4.26   | 0.00±0.00    | 0.00±0.00    | 0.00±0.00    | 0.00±0.00    | 0.00±0.00    | 0.00±0.00    | 14.63±1.56         | 0.00±0.00    | 0.00±0.00     | 0.00±0.00            | 0.00±0.00           | 0.00±0.00      | 0.00±0.00       | 0.00±0.00    |
| Nonanal                                                         | 14.74       | 2.04±0.11                                | 4.53±0.51    | 0.00±0.00    | 25.56±0.36   | 24.88±6.39   | 0.00±0.00    | 0.00±0.00    | 5.90±0.56    | 0.00±0.00    | 0.00±0.00          | 1.71±0.33    | 0.00±0.00     | 11.59±0.29           | 33.05±3.70          | 0.00±0.00      | 0.00±0.00       | 7.71±0.97    |
| trans-2-Nonenal                                                 | 16.42       | 0.00±0.00                                | 0.00±0.00    | 0.00±0.00    | 20.76±1.19   | 0.00±0.00    | 0.00±0.00    | 0.00±0.00    | 0.00±0.00    | 0.00±0.00    | 0.00±0.00          | 0.00±0.00    | 4.99±1.14     | 0.00±0.00            | 0.00±0.00           | 3.04±0.77      | 0.00±0.00       | 0.00±0.00    |
| Heptadecane                                                     | 30.30       | 0.00±0.00                                | 2.77±0.29    | 0.00±0.00    | 0.00±0.00    | 0.00±0.00    | 0.00±0.00    | 0.00±0.00    | 0.00±0.00    | 0.00±0.00    | 0.00±0.00          | 12.47±2.26   | 0.00±0.00     | 12.45±0.70           | 0.00±0.00           | 31.21±8.57     | 27.91±5.89      |              |
| Eicosane                                                        | 39.04       | 6.49±1.59                                | 4.74±0.76    | 21.07±7.09   | 7.41±2.04    | 47.37±6.73   | 14.12±5.49   | 4.30±0.67    | 13.76±1.64   | 28.43±1.79   | 15.29±5.04         | 8.01±0.90    | 6.39±0.22     | 16.57±4.70           | 6.39±0.65           | 0.00±0.00      | 18.39±6.83      | 17.49±1.24   |

| Table S4. Compounds with a relative content greater than 100 ng/g among 17 cultivars. |             |                                          |              |                |               |                |               |              |                |                |                    |              |                |                      |                     |                |                 |              |
|---------------------------------------------------------------------------------------|-------------|------------------------------------------|--------------|----------------|---------------|----------------|---------------|--------------|----------------|----------------|--------------------|--------------|----------------|----------------------|---------------------|----------------|-----------------|--------------|
| Substances (Type)                                                                     | RT<br>(min) | Cultivar name and amount released (ng/g) |              |                |               |                |               |              |                |                |                    |              |                |                      |                     |                |                 |              |
|                                                                                       |             | Alexander Fleming                        | Angel Checks | Cang Long      | Chi Fen       | Dan Feng       | Fen Yu Lou    | Gardenia     | Hei Xiu Qiu    | Hong Cha Hua   | Hong Feng Zhan Chi | Hong Xiu Qiu | Lollipop       | Madame De Verneville | Red Sarah Bernhardt | Wu Hua Long Yu | Yuan Ye Jin Qiu | Joker        |
| Terpenoids (15)                                                                       |             |                                          |              |                |               |                |               |              |                |                |                    |              |                |                      |                     |                |                 |              |
| Monoterpenoids (12)                                                                   |             |                                          |              |                |               |                |               |              |                |                |                    |              |                |                      |                     |                |                 |              |
| α-Pinene                                                                              | 9.27        | 0.00±0.00                                | 0.00±0.00    | 154.15±7.22    | 0.00±0.00     | 374.45±64.68   | 0.00±0.00     | 0.00±0.00    | 0.00±0.00      | 734.09±60.98   | 223.29±11.30       | 0.00±0.00    | 767.67±10.44   | 163.72±52.09         | 0.00±0.00           | 0.00±0.00      | 0.00±0.00       | 0.00±0.00    |
| β-Pinene                                                                              | 11.15       | 0.00±0.00                                | 0.00±0.00    | 259.26±12.34   | 0.00±0.00     | 0.00±0.00      | 0.00±0.00     | 0.00±0.00    | 0.00±0.00      | 0.00±0.00      | 0.00±0.00          | 0.00±0.00    | 0.00±0.00      | 0.00±0.00            | 150.29±19.35        | 0.00±0.00      | 0.00±0.00       | 0.00±0.00    |
| D-Limonene                                                                            | 12.40       | 0.00±0.00                                | 0.00±0.00    | 0.00±0.00      | 0.00±0.00     | 154.50±12.51   | 0.00±0.00     | 0.00±0.00    | 0.00±0.00      | 184.48±26.93   | 0.00±0.00          | 0.00±0.00    | 153.25±10.28   | 0.00±0.00            | 0.00±0.00           | 0.00±0.00      | 0.00±0.00       | 0.00±0.00    |
| Eucalyptol                                                                            | 12.44       | 0.00±0.00                                | 0.00±0.00    | 0.00±0.00      | 0.00±0.00     | 0.00±0.00      | 0.00±0.00     | 0.00±0.00    | 0.00±0.00      | 0.00±0.00      | 183.47±33.49       | 0.00±0.00    | 0.00±0.00      | 0.00±0.00            | 0.00±0.00           | 0.00±0.00      | 0.00±0.00       | 0.00±0.00    |
| Linalool                                                                              | 14.62       | 0.00±0.00                                | 803.29±24.04 | 164.00±5.24    | 119.35±6.15   | 185.75±9.51    | 0.00±0.00     | 609.27±23.64 | 169.29±18.50   | 173.45±17.58   | 375.22±25.13       | 751.69±8.56  | 1968.19±135.69 | 511.26±88.21         | 319.53±22.91        | 251.29±9.78    | 0.00±0.00       | 0.00±0.00    |
| Myrtanal                                                                              | 17.13       | 0.00±0.00                                | 0.00±0.00    | 0.00±0.00      | 0.00±0.00     | 101.67±14.23   | 421.53±4.47   | 0.00±0.00    | 0.00±0.00      | 0.00±0.00      | 0.00±0.00          | 0.00±0.00    | 0.00±0.00      | 0.00±0.00            | 0.00±0.00           | 277.00±10.99   | 0.00±0.00       | 0.00±0.00    |
| (1S)-Verbenone                                                                        | 17.85       | 0.00±0.00                                | 0.00±0.00    | 339.70±50.82   | 0.00±0.00     | 0.00±0.00      | 0.00±0.00     | 0.00±0.00    | 0.00±0.00      | 0.00±0.00      | 0.00±0.00          | 0.00±0.00    | 0.00±0.00      | 0.00±0.00            | 0.00±0.00           | 0.00±0.00      | 0.00±0.00       | 0.00±0.00    |
| Nerol                                                                                 | 18.39       | 0.00±0.00                                | 0.00±0.00    | 0.00±0.00      | 0.00±0.00     | 0.00±0.00      | 113.14±2.84   | 0.00±0.00    | 0.00±0.00      | 0.00±0.00      | 0.00±0.00          | 0.00±0.00    | 0.00±0.00      | 0.00±0.00            | 0.00±0.00           | 0.00±0.00      | 0.00±0.00       | 0.00±0.00    |
| Citronellol                                                                           | 18.52       | 111.37±15.69                             | 0.00±0.00    | 3506.51±270.35 | 1315.70±42.26 | 8175.22±392.51 | 0.00±0.00     | 608.92±5.53  | 2502.31±179.43 | 480.58±32.26   | 1873.56±102.75     | 0.00±0.00    | 0.00±0.00      | 2250.67±124.41       | 1323.10±103.32      | 4696.01±200.19 | 0.00±0.00       | 0.00±0.00    |
| Citral                                                                                | 18.72       | 113.20±15.70                             | 0.00±0.00    | 294.58±21.47   | 184.31±25.00  | 480.68±27.65   | 0.00±0.00     | 0.00±0.00    | 167.95±5.83    | 876.35±119.18  | 244.25±16.26       | 467.44±14.41 | 128.86±5.08    | 973.82±85.26         | 577.52±45.70        | 266.47±40.67   | 131.04±11.13    | 0.00±0.00    |
| Geraniol                                                                              | 19.13       | 108.46±1.65                              | 0.00±0.00    | 641.02±67.74   | 145.09±15.59  | 554.58±22.03   | 114.49±2.01   | 411.09±14.36 | 102.98±10.29   | 1661.60±127.40 | 577.59±18.30       | 479.71±10.88 | 249.05±18.60   | 838.55±53.27         | 576.04±11.93        | 437.67±14.86   | 1193.35±63.20   | 0.00±0.00    |
| (-)-cis-Myrtanol                                                                      | 19.43       | 0.00±0.00                                | 0.00±0.00    | 0.00±0.00      | 0.00±0.00     | 0.00±0.00      | 262.89±21.77  | 0.00±0.00    | 0.00±0.00      | 0.00±0.00      | 0.00±0.00          | 0.00±0.00    | 0.00±0.00      | 0.00±0.00            | 0.00±0.00           | 0.00±0.00      | 0.00±0.00       | 0.00±0.00    |
| Sesquiterpenoids (1)                                                                  |             |                                          |              |                |               |                |               |              |                |                |                    |              |                |                      |                     |                |                 |              |
| Carvophyllene                                                                         | 23.69       | 151.56±28.57                             | 143.65±28.99 | 312.50±27.79   | 105.93±5.45   | 323.42±33.51   | 108.46±5.74   | 120.57±7.43  | 120.69±12.73   | 160.38±33.86   | 472.09±29.51       | 101.10±0.34  | 221.13±17.21   | 0.00±0.00            | 111.09±3.73         | 148.05±25.56   | 102.81±11.66    | 0.00±0.00    |
| Irregular terpenoids (2)                                                              |             |                                          |              |                |               |                |               |              |                |                |                    |              |                |                      |                     |                |                 |              |
| Citronellvl acetate                                                                   | 21.76       | 0.00±0.00                                | 0.00±0.00    | 0.00±0.00      | 0.00±0.00     | 0.00±0.00      | 0.00±0.00     | 0.00±0.00    | 0.00±0.00      | 0.00±0.00      | 0.00±0.00          | 0.00±0.00    | 0.00±0.00      | 137.80±11.73         | 0.00±0.00           | 0.00±0.00      | 0.00±0.00       | 0.00±0.00    |
| Geranyl acetate                                                                       | 22.49       | 0.00±0.00                                | 0.00±0.00    | 0.00±0.00      | 0.00±0.00     | 0.00±0.00      | 0.00±0.00     | 0.00±0.00    | 0.00±0.00      | 0.00±0.00      | 0.00±0.00          | 0.00±0.00    | 0.00±0.00      | 129.64±38.00         | 0.00±0.00           | 0.00±0.00      | 0.00±0.00       | 0.00±0.00    |
| Benzenoids/Phenylpropanoids (5)                                                       |             |                                          |              |                |               |                |               |              |                |                |                    |              |                |                      |                     |                |                 |              |
| Benzaldehyde, 2-hydroxy-                                                              | 12.99       | 0.00±0.00                                | 0.00±0.00    | 0.00±0.00      | 0.00±0.00     | 0.00±0.00      | 254.90±35.27  | 0.00±0.00    | 0.00±0.00      | 0.00±0.00      | 0.00±0.00          | 0.00±0.00    | 0.00±0.00      | 0.00±0.00            | 0.00±0.00           | 0.00±0.00      | 0.00±0.00       | 729.69±22.29 |
| Phenylethyl Alcohol                                                                   | 15.15       | 1244.62±110.82                           | 875.56±29.81 | 3932.51±236.98 | 611.83±59.90  | 116.59±10.11   | 1091.02±58.33 | 0.00±0.00    | 224.57±21.04   | 594.81±29.41   | 506.10±28.97       | 0.00±0.00    | 774.73±26.1    | 740.44±73.38         | 0.00±0.00           | 0.00±0.00      | 0.00±0.00       | 0.00±0.00    |
| Benzene, 1,2-dimethoxy-                                                               | 15.92       | 0.00±0.00                                | 0.00±0.00    | 0.00±0.00      | 0.00±0.00     | 254.97±1.41    | 0.00±0.00     | 0.00±0.00    | 0.00±0.00      | 0.00±0.00      | 0.00±0.00          | 0.00±0.00    | 0.00±0.00      | 309.70±8.48          | 0.00±0.00           | 0.00±0.00      | 0.00±0.00       | 0.00±0.00    |
| Benzene, 1,4-dimethoxy-                                                               | 16.51       | 0.00±0.00                                | 0.00±0.00    | 0.00±0.00      | 0.00±0.00     | 604.13±46.28   | 0.00±0.00     | 0.00±0.00    | 0.00±0.00      | 106.60±3.44    | 0.00±0.00          | 0.00±0.00    | 0.00±0.00      | 0.00±0.00            | 0.00±0.00           | 0.00±0.00      | 0.00±0.00       | 0.00±0.00    |
| Methyl salicylate                                                                     | 17.46       | 0.00±0.00                                | 0.00±0.00    | 0.00±0.00      | 0.00±0.00     | 0.00±0.00      | 0.00±0.00     | 0.00±0.00    | 0.00±0.00      | 0.00±0.00      | 0.00±0.00          | 0.00±0.00    | 0.00±0.00      | 0.00±0.00            | 0.00±0.00           | 0.00±0.00      | 0.00±0.00       | 540.23±42.78 |
| Fatty acid derivatives (6)                                                            |             |                                          |              |                |               |                |               |              |                |                |                    |              |                |                      |                     |                |                 |              |
| Hexanal                                                                               | 5.21        | 492.56±18.44                             | 354.57±30.18 | 118.86±20.45   | 363.69±45.94  | 511.76±65.21   | 392.77±46.95  | 309.88±21.22 | 306.01±16.40   | 412.80±13.87   | 419.45±68.38       | 446.48±43.97 | 771.36±35.02   | 286.77±40.09         | 381.98±33.29        | 317.37±47.37   | 371.96±19.14    | 490.32±57.54 |
| 2-Hexenal                                                                             | 6.85        | 723.97±83.11                             | 568.46±80.67 | 273.50±35.89   | 251.45±20.76  | 523.62±59.85   | 365.33±18.68  | 596.78±17.95 | 223.11±43.52   | 436.45±16.38   | 723.61±168.07      | 389.61±57.06 | 517.48±116.35  | 815.93±139.11        | 383.63±73.06        | 616.20±37.04   | 849.79±61.15    | 674.49±29.70 |
| 3-Hexen-1-ol                                                                          | 6.89        | 128.08±12.63                             | 122.74±8.53  | 544.70±89.44   | 233.10±8.40   | 117.07±19.85   | 192.41±16.94  | 156.73±12.24 | 282.63±13.77   | 222.16±11.60   | 0.00±0.00          | 233.54±27.08 | 0.00±0.00      | 194.86±19.33         | 239.59±18.93        | 177.66±18.67   | 0.00±0.00       | 0.00±0.00    |
| trans-2-Hexenol                                                                       | 7.23        | 0.00±0.00                                | 0.00±0.00    | 0.00±0.00      | 0.00±0.00     | 0.00±0.00      | 135.76±7.31   | 0.00±0.00    | 0.00±0.00      | 0.00±0.00      | 121.24±2.80        | 0.00±0.00    | 0.00±0.00      | 0.00±0.00            | 0.00±0.00           | 0.00±0.00      | 0.00±0.00       | 0.00±0.00    |
| 1-Hexanol                                                                             | 7.37        | 0.00±0.00                                | 0.00±0.00    | 338.73±69.85   | 212.49±21.15  | 197.16±49.80   | 0.00±0.00     | 0.00±0.00    | 254.34±21.86   | 0.00±0.00      | 194.32±9.49        | 0.00±0.00    | 227.96±80.30   | 0.00±0.00            | 113.25±23.68        | 353.05±15.56   | 249.50±17.50    | 0.00±0.00    |
| 1-Hexanol, 2-ethyl-                                                                   | 12.40       | 0.00±0.00                                | 0.00±0.00    | 0.00±0.00      | 100.29±7.37   | 0.00±0.00      | 0.00±0.00     | 0.00±0.00    | 0.00±0.00      | 0.00±0.00      | 165.39±28.16       | 0.00±0.00    | 0.00±0.00      | 0.00±0.00            | 0.00±0.00           | 0.00±0.00      | 0.00±0.00       | 0.00±0.00    |

| Table S5. Descriptions and threshold values of major herbaceous peony scent compounds. |                                                                     |                     |                        |                     |              |              |             |              |            |              |              |              |                    |              |               |                      |                     |                |                 |            |
|----------------------------------------------------------------------------------------|---------------------------------------------------------------------|---------------------|------------------------|---------------------|--------------|--------------|-------------|--------------|------------|--------------|--------------|--------------|--------------------|--------------|---------------|----------------------|---------------------|----------------|-----------------|------------|
| Substances (Type)                                                                      | Odor discription                                                    | Odor Classification | Odor Threshold (mg/kg) | Odor Activity Value |              |              |             |              |            |              |              |              |                    |              |               |                      |                     |                |                 |            |
|                                                                                        |                                                                     |                     |                        | Alexander Fleming   | Angel Checks | Cang Long    | Chi Fen     | Dan Feng     | Fen Yu Lou | Gardenia     | Hei Xiu Qiu  | Hong Cha Hua | Hong Feng Zhan Chi | Hong Xiu Qiu | Lollipop      | Madame De Verneville | Red Sarah Bernhardt | Wu Hua Long Yu | Yuan Ye Jin Qiu | Joker      |
| Terpenoids (15)                                                                        |                                                                     |                     |                        |                     |              |              |             |              |            |              |              |              |                    |              |               |                      |                     |                |                 |            |
| Monoterpenoids (12)                                                                    |                                                                     |                     |                        |                     |              |              |             |              |            |              |              |              |                    |              |               |                      |                     |                |                 |            |
| α-Pinene                                                                               | Charaistractic odor of pine                                         | Herbal              | 0.12                   | 0.00±0.00           | 0.00±0.00    | 1.28±0.06    | 0.00±0.00   | 3.12±0.54    | 0.00±0.00  | 0.00±0.00    | 0.00±0.00    | 6.12±0.51    | 1.86±0.09          | 0.00±0.00    | 6.40±0.09     | 1.36±0.43            | 0.00±0.00           | 0.00±0.00      | 0.00±0.00       | 0.00±0.00  |
| β-Pinene                                                                               | Characteristic turpentine odor with a dry, woody or resinous aroma  | Woody               | 0.14                   | 0.00±0.00           | 0.00±0.00    | 1.85±0.09    | 0.00±0.00   | 0.00±0.00    | 0.00±0.00  | 0.00±0.00    | 0.00±0.00    | 0.00±0.00    | 0.00±0.00          | 0.00±0.00    | 0.00±0.00     | 0.00±0.00            | 1.07±0.14           | 0.00±0.00      | 0.00±0.00       | 0.00±0.00  |
| D-Limonene                                                                             | Pleasant, lemon-like odor                                           | Fruity-Citrus       | 0.034                  | 0.00±0.00           | 0.00±0.00    | 0.00±0.00    | 0.00±0.00   | 4.54±0.37    | 0.00±0.00  | 0.00±0.00    | 0.00±0.00    | 5.43±0.79    | 0.00±0.00          | 0.00±0.00    | 4.51±0.30     | 0.00±0.00            | 0.00±0.00           | 0.00±0.00      | 0.00±0.00       | 0.00±0.00  |
| Eucalyptol                                                                             | Characteristic camphoraceous odor and fresh, pungent, cooling taste | Spicy               | 0.01                   | 0.00±0.00           | 0.00±0.00    | 0.00±0.00    | 0.00±0.00   | 0.00±0.00    | 0.00±0.00  | 0.00±0.00    | 0.00±0.00    | 0.00±0.00    | 18.35±3.35         | 0.00±0.00    | 0.00±0.00     | 0.00±0.00            | 0.00±0.00           | 0.00±0.00      | 0.00±0.00       | 0.00±0.00  |
| Linalool                                                                               | Typical pleasant floral and citrus odor                             | Floral-lily         | 0.0015                 | 0.00±0.00           | 535.53±16.03 | 109.33±3.49  | 79.57±4.10  | 123.83±6.34  | 0.00±0.00  | 406.18±15.76 | 112.86±12.33 | 115.63±11.72 | 250.15±16.75       | 501.13±5.71  | 1312.13±90.46 | 340.84±58.81         | 213.02±15.27        | 167.53±6.52    | 0.00±0.00       | 0.00±0.00  |
| Myrtenal                                                                               | Cinnamon odor                                                       | Spicy               | n/a                    | 0.00±0.00           | 0.00±0.00    | 0.00±0.00    | 0.00±0.00   | n/a          | n/a        | 0.00±0.00    | 0.00±0.00    | 0.00±0.00    | 0.00±0.00          | 0.00±0.00    | 0.00±0.00     | 0.00±0.00            | 0.00±0.00           | n/a            | 0.00±0.00       | 0.00±0.00  |
| (1S)-Verbenone                                                                         | Verbena odor                                                        | Herbal              | n/a                    | 0.00±0.00           | 0.00±0.00    | n/a          | 0.00±0.00   | 0.00±0.00    | 0.00±0.00  | 0.00±0.00    | 0.00±0.00    | 0.00±0.00    | 0.00±0.00          | 0.00±0.00    | 0.00±0.00     | 0.00±0.00            | 0.00±0.00           | 0.00±0.00      | 0.00±0.00       | 0.00±0.00  |
| Nerol                                                                                  | Lemon-like, floral odor                                             | Fruity-Citrus       | 0.3                    | 0.00±0.00           | 0.00±0.00    | 0.00±0.00    | 0.00±0.00   | 0.00±0.00    | 0.38±0.01  | 0.00±0.00    | 0.00±0.00    | 0.00±0.00    | 0.00±0.00          | 0.00±0.00    | 0.00±0.00     | 0.00±0.00            | 0.00±0.00           | 0.00±0.00      | 0.00±0.00       | 0.00±0.00  |
| Citronellol                                                                            | Fresh rosy odor                                                     | Floral-rose         | 0.01                   | 11.14±1.57          | 0.00±0.00    | 350.65±27.04 | 131.57±4.23 | 817.52±39.25 | 0.00±0.00  | 60.89±0.55   | 250.23±17.94 | 48.06±3.23   | 187.36±10.28       | 0.00±0.00    | 0.00±0.00     | 225.07±12.44         | 132.31±10.33        | 469.60±20.02   | 0.00±0.00       | 0.00±0.00  |
| Citral                                                                                 | Citrus and lemon-like odor                                          | Fruity-Citrus       | 0.032                  | 3.54±0.49           | 0.00±0.00    | 9.21±0.67    | 5.76±0.78   | 15.02±0.86   | 0.00±0.00  | 0.00±0.00    | 5.25±0.18    | 27.39±3.72   | 7.63±0.51          | 14.61±0.45   | 4.03±0.16     | 30.43±2.66           | 18.05±1.43          | 8.33±1.27      | 4.10±0.35       | 0.00±0.00  |
| Geraniol                                                                               | Rose-like, sweet odor                                               | Floral-rose         | 0.0075                 | 14.46±0.22          | 0.00±0.00    | 85.47±9.03   | 19.35±2.08  | 73.94±2.94   | 15.27±0.27 | 54.81±1.91   | 13.73±1.37   | 221.55±16.99 | 77.01±2.44         | 63.96±1.45   | 33.21±2.48    | 111.81±7.10          | 76.81±1.59          | 58.36±1.98     | 159.11±8.43     | 0.00±0.00  |
| (-)-cis-Myrtenol                                                                       | Sandalwood and cool mint, soft odor                                 | Woody               | n/a                    | 0.00±0.00           | 0.00±0.00    | 0.00±0.00    | 0.00±0.00   | 0.00±0.00    | n/a        | 0.00±0.00    | 0.00±0.00    | 0.00±0.00    | 0.00±0.00          | 0.00±0.00    | 0.00±0.00     | 0.00±0.00            | 0.00±0.00           | 0.00±0.00      | 0.00±0.00       | 0.00±0.00  |
| Sesquiterpenoids (1)                                                                   |                                                                     |                     |                        |                     |              |              |             |              |            |              |              |              |                    |              |               |                      |                     |                |                 |            |
| Carvophyllene                                                                          | Woody-spicy, dry, clove-like odor                                   | Woody               | 0.15                   | 1.01±0.19           | 0.96±0.19    | 2.08±0.19    | 0.71±0.04   | 2.16±0.22    | 0.72±0.04  | 0.80±0.05    | 0.80±0.08    | 1.07±0.23    | 3.15±0.20          | 0.67±0.002   | 1.47±0.11     | 0.00±0.00            | 0.74±0.02           | 0.99±0.17      | 0.69±0.08       | 0.00±0.00  |
| Irregular terpenoids (2)                                                               |                                                                     |                     |                        |                     |              |              |             |              |            |              |              |              |                    |              |               |                      |                     |                |                 |            |
| Citronellyl acetate                                                                    | Fresh, rose, fruity odor                                            | Floral-rose         | 1                      | 0.00±0.00           | 0.00±0.00    | 0.00±0.00    | 0.00±0.00   | 0.00±0.00    | 0.00±0.00  | 0.00±0.00    | 0.00±0.00    | 0.00±0.00    | 0.00±0.00          | 0.00±0.00    | 0.00±0.00     | 0.14±0.01            | 0.00±0.00           | 0.00±0.00      | 0.00±0.00       | 0.00±0.00  |
| Geranyl acetate                                                                        | Lavender odor                                                       | Herbal              | 0.1                    | 0.00±0.00           | 0.00±0.00    | 0.00±0.00    | 0.00±0.00   | 0.00±0.00    | 0.00±0.00  | 0.00±0.00    | 0.00±0.00    | 0.00±0.00    | 0.00±0.00          | 0.00±0.00    | 0.00±0.00     | 1.30±0.38            | 0.00±0.00           | 0.00±0.00      | 0.00±0.00       | 0.00±0.00  |
| Benzenoids/Phenylpropenoids (5)                                                        |                                                                     |                     |                        |                     |              |              |             |              |            |              |              |              |                    |              |               |                      |                     |                |                 |            |
| Benzaldehyde, 2-hydroxy-                                                               | Almond and herb-like odor                                           | Herbal              | 0.34                   | 0.00±0.00           | 0.00±0.00    | 0.00±0.00    | 0.00±0.00   | 0.00±0.00    | 0.75±0.10  | 0.00±0.00    | 0.00±0.00    | 0.00±0.00    | 0.00±0.00          | 0.00±0.00    | 0.00±0.00     | 0.00±0.00            | 0.00±0.00           | 0.00±0.00      | 0.00±0.00       | 2.15±0.07  |
| Phenylethyl Alcohol                                                                    | Honey-like, floral odor                                             | Floral-rose         | 0.045                  | 27.66±2.46          | 19.46±0.66   | 87.39±5.27   | 13.60±1.33  | 2.59±0.22    | 24.24±1.30 | 0.00±0.00    | 4.99±0.47    | 13.22±0.65   | 11.25±0.64         | 0.00±0.00    | 17.22±0.58    | 16.45±1.63           | 0.00±0.00           | 0.00±0.00      | 0.00±0.00       | 0.00±0.00  |
| Benzene, 1,2-dimethoxy-                                                                | Fruity odor                                                         | Fruity-sweet        | 0.775                  | 0.00±0.00           | 0.00±0.00    | 0.00±0.00    | 0.00±0.00   | 0.33±0.002   | 0.00±0.00  | 0.00±0.00    | 0.00±0.00    | 0.00±0.00    | 0.00±0.00          | 0.00±0.00    | 0.00±0.00     | 0.40±0.01            | 0.00±0.00           | 0.00±0.00      | 0.00±0.00       | 0.00±0.00  |
| Benzene, 1,4-dimethoxy-                                                                | Clove-like odor                                                     | Woody               | 0.0214                 | 0.00±0.00           | 0.00±0.00    | 0.00±0.00    | 0.00±0.00   | 28.23±2.16   | 0.00±0.00  | 0.00±0.00    | 0.00±0.00    | 4.98±0.16    | 0.00±0.00          | 0.00±0.00    | 0.00±0.00     | 0.00±0.00            | 0.00±0.00           | 0.00±0.00      | 0.00±0.00       | 0.00±0.00  |
| Methyl salicylate                                                                      | Minty, spicy, sweet, wintergreen-like odor                          | Spicy               | 0.04                   | 0.00±0.00           | 0.00±0.00    | 0.00±0.00    | 0.00±0.00   | 0.00±0.00    | 0.00±0.00  | 0.00±0.00    | 0.00±0.00    | 0.00±0.00    | 0.00±0.00          | 0.00±0.00    | 0.00±0.00     | 0.00±0.00            | 0.00±0.00           | 0.00±0.00      | 0.00±0.00       | 13.51±1.07 |
| Fatty acid derivatives (6)                                                             |                                                                     |                     |                        |                     |              |              |             |              |            |              |              |              |                    |              |               |                      |                     |                |                 |            |
| Hexanal                                                                                | Grassy-green odor, apple odor                                       | Herbal              | 0.0615                 | 8.01±0.30           | 5.77±0.49    | 1.93±0.33    | 5.91±0.75   | 8.32±1.06    | 6.39±0.76  | 5.04±0.35    | 4.98±0.27    | 6.71±0.23    | 6.82±1.11          | 7.26±0.71    | 12.54±0.57    | 4.66±0.65            | 6.21±0.54           | 5.16±0.77      | 6.05±0.31       | 7.97±0.94  |
| 2-Hexenal                                                                              | Leaves, fruits, vegetables-like odor                                | Herbal              | 0.3                    | 2.41±0.28           | 1.89±0.27    | 0.91±0.12    | 0.84±0.07   | 1.75±0.20    | 1.22±0.06  | 1.99±0.06    | 0.74±0.15    | 1.45±0.05    | 2.41±0.56          | 1.30±0.19    | 1.72±0.39     | 2.72±0.46            | 1.28±0.24           | 2.05±0.12      | 2.83±0.20       | 2.25±0.10  |
| 3-Hexen-1-ol                                                                           | Intense, grassy-green odor                                          | Herbal              | 1.9                    | 0.07±0.01           | 0.06±0.004   | 0.29±0.05    | 0.12±0.004  | 0.06±0.01    | 0.10±0.01  | 0.08±0.01    | 0.15±0.01    | 0.12±0.01    | 0.00±0.00          | 0.12±0.01    | 0.00±0.00     | 0.10±0.01            | 0.13±0.01           | 0.09±0.01      | 0.00±0.00       | 0.00±0.00  |
| trans-2-Hexenol                                                                        | Strong grassy-green odor, accompanied by fruit and vegetable odor   | Herbal              | 4.2                    | 0.00±0.00           | 0.00±0.00    | 0.00±0.00    | 0.00±0.00   | 0.00±0.00    | 0.03±0.002 | 0.00±0.00    | 0.00±0.00    | 0.00±0.00    | 0.03±0.001         | 0.00±0.00    | 0.00±0.00     | 0.00±0.00            | 0.00±0.00           | 0.00±0.00      | 0.00±0.00       | 0.00±0.00  |
| 1-Hexanol                                                                              | Fruity odor and light grass odor                                    | Fruity-sweet        | 0.2                    | 0.00±0.00           | 0.00±0.00    | 1.69±0.35    | 1.06±0.11   | 0.99±0.25    | 0.00±0.00  | 0.00±0.00    | 1.27±0.11    | 0.00±0.00    | 0.97±0.05          | 0.00±0.00    | 1.14±0.40     | 0.00±0.00            | 0.57±0.12           | 1.77±0.08      | 1.25±0.09       | 0.00±0.00  |
| 1-Hexanol, 2-ethyl-                                                                    | Sweet taste and light floral odor                                   | Fruity-sweet        | 1.63                   | 0.00±0.00           | 0.00±0.00    | 0.00±0.00    | 0.06±0.005  | 0.00±0.00    | 0.00±0.00  | 0.00±0.00    | 0.00±0.00    | 0.00±0.00    | 0.00±0.00          | 0.00±0.00    | 0.00±0.00     | 0.00±0.00            | 0.10±0.02           | 0.00±0.00      | 0.00±0.00       | 0.00±0.00  |

compounds was mainly derived by references [17, 43, 75].  
xm Van Gemert [76] and online database (<http://www.vcf-online.nl/VcfHome.cfm>)  
sld could not be obtained from references.



**Table S6. Sequences of primers used in the qRT-PCR analysis.**

| Gene             | Gene ID        | Forward primer (5'-3') | Reverse primer (5'-3') |
|------------------|----------------|------------------------|------------------------|
| <i>PIGADPH</i>   | -              | TG TTCACCGACAAAGACAAGG | TAGCCAAGGGAGCAAGACAAT  |
| <i>PIDXS1</i>    | Isoform0006850 | GCTGGATTTTGTGCTTTCGT   | TCGCCAACATCAGGTAAAGAA  |
| <i>PIDXS2</i>    | Isoform0020550 | TATATTGGCCCTGTTGACGGT  | TTTATCCACCTCTGCTTCTGC  |
| <i>PIDXS3</i>    | Isoform0025186 | GGAGCATTTGACACCACTTAC  | CCACCCTACTTCCCTCCTTT   |
| <i>PIDXR1</i>    | Isoform0016237 | CGGGATGAATTTGTGAAGGGT  | GGTGGCCAATGAAACGAGAAA  |
| <i>PLMCT1</i>    | Isoform0031172 | CTGTGTCTCCATCCATCATCT  | TTACTCTCTCCTTTCTCGCCA  |
| <i>PLCMK1</i>    | Isoform0026855 | GGAACGGGCCAATAATTAGGA  | GCAGAGCAAGTTCATGTGAGT  |
| <i>PLMDS1</i>    | Isoform0032368 | GGAAATCTAGACGCCACCTT   | TAAAAGTACAAACATCCGCCC  |
| <i>PIHDS1</i>    | Isoform0004050 | GATGGCCACTGGAAATAAGA   | ACCAGCAACCAACCAACTAA   |
| <i>PIHDR1</i>    | Isoform0030314 | CAATTGGTGTTACATCTGGTG  | CAACTCAGACATAAAAAGCCC  |
| <i>PIGPPS1</i>   | Isoform0022374 | TGTGGCACTTGCTTCTTTGAG  | AGCCAACATTGCAACTTCTGC  |
| <i>PIGPPS2</i>   | Isoform0024241 | GGGTGGTCTAAACTAATGTG   | TCTGCTATAGCTCTCTCTCTT  |
| <i>PIGPPS3</i>   | Isoform0029797 | ATTGATACACGATGACTTGCC  | TCTTGCACAAAGTCTACCGAA  |
| <i>PIGPPS4</i>   | Isoform0031454 | AAAATATTTTGATCAAGCTA   | GAAAACAAAACCATAAACAT   |
| <i>PITPS1</i>    | Isoform0014930 | ATGAAGAGTTTGACCACGGAC  | ATCGGCGGCATCCTGTTTGA   |
| <i>PITPS2</i>    | Isoform0019028 | ATGGCTACACGTCTGGTTGCT  | GCATCGTCTTCACTTGTCTC   |
| <i>PITPS3</i>    | Isoform0019388 | ATGGCCATTTGCTCTGTGATT  | CACCACTTTGGCAAGCTTCA   |
| <i>PITPS4</i>    | Isoform0019653 | ACGAGCCATCTCTCTCCATG   | GGTCGCAATGGAGCTGTGAT   |
| <i>PLAADC1</i>   | Isoform0022490 | ATTCTAGCGGTCGTGCATAC   | GGTAGTAATTTGTGCCATCC   |
| <i>PLAADC2</i>   | Isoform0019696 | CTACTCTTAAATAGACTATTA  | GATAAAAAATAGTATACACGG  |
| <i>PLMAO1</i>    | Isoform0004723 | CAAAGCTGTGATCAACGAGT   | GTCCAATCTTGCAAAACGTC   |
| <i>PLCYP79-1</i> | Isoform0021861 | ATGGCCATCACTCTTGTATC   | AGGGATGTTTCCAAGAATAG   |
| <i>PIPAR1</i>    | Isoform0031719 | GACGAAGCTGTTGACATGTT   | CCTCTTCCAGTAAATTTGCC   |
| <i>PIPAR2</i>    | Isoform0030865 | AAGGTCTTTCATCCAAATAA   | TTTGGATAAACATGCAAACA   |

---

|               |                |                       |                       |
|---------------|----------------|-----------------------|-----------------------|
| <i>PIPAR3</i> | Isoform0030220 | GCTGACTGCTAAAATGAACAC | ACAACTGGTTCTTTTTTCTTT |
| <i>PIPAR4</i> | Isoform0030470 | GGCTATCTACCTGCCACTAC  | GGAATACCAAGAAAACAATA  |
| <i>PIPAR5</i> | Isoform0028371 | TTACAGAAGTTGAAGTGTGG  | GGAAATAATAACAAACAAAT  |
| <i>PIPAR6</i> | Isoform0030732 | TATTCTCTAAAACATTTGTA  | ACGTGGTGAACATGACTTAA  |
| <i>PIPAR7</i> | Isoform0029313 | GGGAACTATGGTTGTGAAAA  | ACATACATATCGGACAGACT  |
| <i>PIADH1</i> | Isoform0028495 | ATTTTTCCTATTTGATTTTC  | AATCAAGTTCACAAGTCTTC  |
| <i>PIADH2</i> | Isoform0028166 | GTTGAGTTGTCTCTGAGCTA  | AGAAGAAAATGAAGTTTAAA  |
| <i>PIADH3</i> | Isoform0027181 | GTACATTGAGAATAATCTGT  | CCGGAAACAAATACGACTAA  |
| <i>PIADH4</i> | Isoform0028765 | TTGAGTACATGATTAAGGGG  | GTGAACCTCATCAAAATGTA  |
| <i>PIADH5</i> | Isoform0028314 | GGAGGTCATCCGAAAAATTA  | TAACTTGACCTTGGGTAGCC  |
| <i>PIADH6</i> | Isoform0026717 | TTCTTAGGGCTGGGGAATAT  | CTAGGAAAAAAAGATCAAAT  |
| <i>PIADH7</i> | Isoform0025289 | GCTGTGGTACACAAGTGTTG  | GAAAAAAGTTGCCCAGTTTT  |
| <i>PIADH8</i> | Isoform0029306 | ATAATAATATCGGTAAGACG  | GTCGATATCTAACCAGGTAT  |
| <i>PIADH9</i> | Isoform0028507 | TCACCATCATCAATGTTTTT  | GAAATACCATCCAAAAGTAT  |

---
